# Supplementary material for: An electrochemical sensor for dopamine based on polydopamine modified reduced graphene oxide anchored with tin dioxide and gold nanoparticles
Source: Royal Society of Chemistry journal article supplement (doi:10.1039/c7ay00991g), 2017-01-01
Supplement: c7ay00991g1.pdf [file c7ay00991g1.pdf]

The electrochemical sensor of dopamine based on polydopamine  
modified reduced graphene oxide anchored with tin dioxide and gold  
nanoparticles

Xiaoqing Cui<sup>a</sup>, Xian Fang<sup>a</sup>, Hong Zhao<sup>a\*</sup>, Zengxi Li<sup>1\*</sup>, Hongxuan Ren<sup>b\*</sup>

<sup>a</sup> *School of Chemistry and Chemical Engineering, University of Chinese Academy of Sciences, 19A*

*YuQuan Road, Beijing 100049, China*

<sup>b</sup> *National Center for Nanoscience and Technology of China, Beijing, 100080, China*

---

\* Corresponding author: Tel.: +86-10-88256827. E-mail address: hongzhao@ucas.ac.cn (H. Zhao);

lizengxi@ucas.ac.cn (Z. Li); [bruseren@nanoctr.cn](mailto:bruseren@nanoctr.cn) (H. Ren).

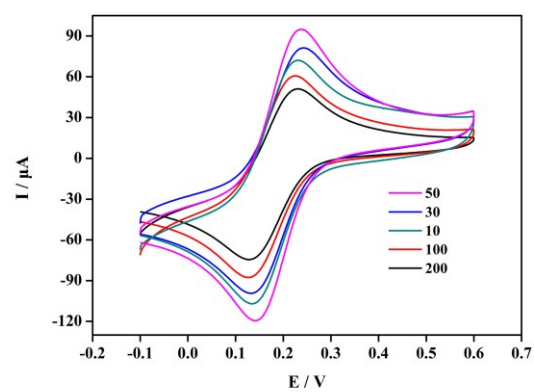

**Fig. S1** CVs of potassium ferricyanide solution containing 0.1 M KCl and 5 mM  $K_3[Fe(CN)_6]$  at pRGO/AuNPs nanomaterials modified electrode. pRGO/AuNPs nanomaterials were prepared from 10  $\mu$ L, 30  $\mu$ L, 50  $\mu$ L, 100  $\mu$ L, 200  $\mu$ L  $HAuCl_4 \cdot 4H_2O$  (0.02 mM) solution and 6 mL pRGO solution, respectively, scan rate, 100  $mV s^{-1}$ .

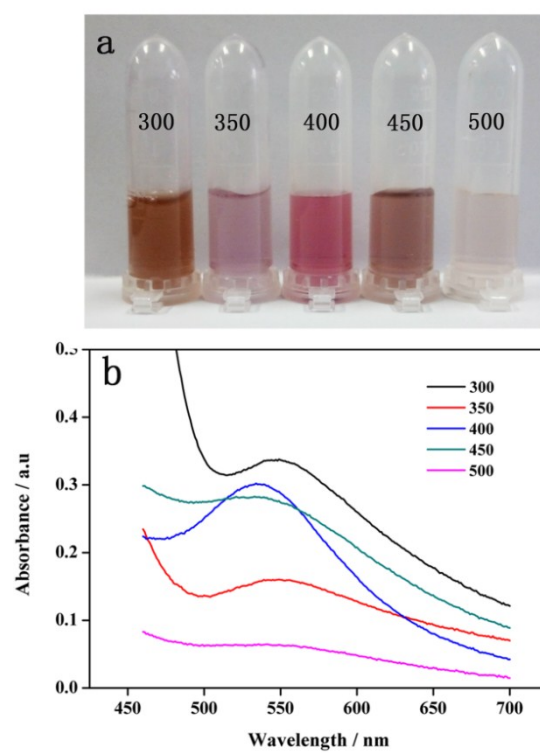

**Fig. S2** (a) Photographs and (b) UV-vis absorption spectra SnO<sub>2</sub>/AuNPs nanomaterials prepared from 50 μL HAuCl<sub>4</sub>·4H<sub>2</sub>O (0.02 mM) solution and 300 μL, 350 μL, 400 μL, 450 μL, 500 μL SnCl<sub>2</sub>·2H<sub>2</sub>O (0.01 mM) solution, respectively.

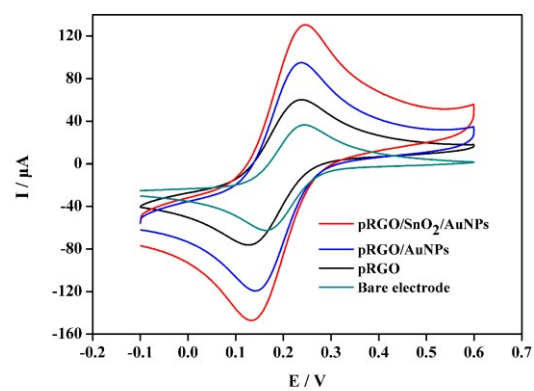

**Fig. S3** CVs of potassium ferricyanide solution containing 0.1 M KCl and 5 mM  $K_3[Fe(CN)_6]$  at bare GCE, pRGO/GCE, pRGO/AuNPs/GCE and pRGO/SnO<sub>2</sub>/AuNPs/GCE, scan rate, 100 mV s<sup>-1</sup>;
